# Supplementary material
Source: PubMed Central journal article supplement (PMC2813430)
Supplement: NIHMS155634-supplement-01.pdf [file NIHMS155634-supplement-01.pdf]

## Supplementary Material

### Exploring linkage dependence of polyubiquitin conformations using molecular modeling

David Fushman & Olivier Walker

**Table S1. Accessible (for selected residues) and buried (BSA) surface areas for the best structures for all generated di-ubiquitin chains.**

| Chain linkage | Distal domain                        |                                       |                                       |                                       |                | Proximal domain                      |                                       |                                       |                                       |                |
|---------------|--------------------------------------|---------------------------------------|---------------------------------------|---------------------------------------|----------------|--------------------------------------|---------------------------------------|---------------------------------------|---------------------------------------|----------------|
|               | V8 <sup>a</sup><br>(Å <sup>2</sup> ) | L44 <sup>a</sup><br>(Å <sup>2</sup> ) | I70 <sup>a</sup><br>(Å <sup>2</sup> ) | BSA <sup>b</sup><br>(Å <sup>2</sup> ) | % <sup>c</sup> | V8 <sup>a</sup><br>(Å <sup>2</sup> ) | L44 <sup>a</sup><br>(Å <sup>2</sup> ) | I70 <sup>a</sup><br>(Å <sup>2</sup> ) | BSA <sup>b</sup><br>(Å <sup>2</sup> ) | % <sup>c</sup> |
| K48           | 38.4                                 | 1.2                                   | 1.1                                   | 704                                   | 15             | 19.6                                 | 2.6                                   | 0.2                                   | 658                                   | 14             |
| K63           | 8.5                                  | 13.3                                  | 27.6                                  | 451                                   | 10             | 133.5                                | 41.1                                  | 39.8                                  | 445                                   | 10             |
| K6            | 7.0                                  | 4.6                                   | 5.7                                   | 518                                   | 12             | 19.8                                 | 5.0                                   | 11.6                                  | 555                                   | 12             |
| K33           | 41.9                                 | 9.5                                   | 1.5                                   | 411                                   | 9              | 142.0                                | 33.6                                  | 24.7                                  | 409                                   | 9              |
| K29           | 31.4                                 | 0.0                                   | 2.7                                   | 514                                   | 11             | 151.1                                | 26.4                                  | 28.3                                  | 506                                   | 11             |
| K27           | 53.5                                 | 27.9                                  | 8.4                                   | 590                                   | 12             | 79.7                                 | 6.9                                   | 4.8                                   | 549                                   | 12             |
| K11           | 52.2                                 | 16.1                                  | 3.3                                   | 726                                   | 15             | 59.9                                 | 5.4                                   | 3.4                                   | 680                                   | 15             |
| HT            | 48.6                                 | 1.4                                   | 0                                     | 552                                   | 13             | 146.6                                | 36.8                                  | 37.1                                  | 521                                   | 13             |
| K48*          | 66.2                                 | 21.8                                  | 23.1                                  | 120                                   | 3              | 116.1                                | 26.8                                  | 19.8                                  | 195                                   | 4              |

<sup>a</sup> Accessible surface area for all atoms of the indicated residues

<sup>b</sup> Buried surface area for a given Ub domain computed with the ProFace server<sup>1</sup>

<sup>c</sup> Percentage of the buried surface area with respect to the total surface of a given domain

**Table S2. Detailed analysis of the hydrophobic contacts for the best structure of all generated di-ubiquitin structures**

| Linkage | Distal Ub | Atom   | Proximal Ub | Atom    | Distance (Å) |        |
|---------|-----------|--------|-------------|---------|--------------|--------|
| K48     | LEU 8     | CG     | LEU 108     | CD1     | 3.6927       |        |
|         | LEU 8     | CD1    | LEU 108     | CD1     | 3.6243       |        |
|         | LEU 8     | CD1    | LEU 108     | CD2     | 3.5428       |        |
|         | LEU 8     | CD1    | ILE 144     | CB      | 3.8321       |        |
|         | LEU 8     | CD1    | ILE 144     | CG2     | 3.4398       |        |
|         | LEU 8     | CD2    | LEU 108     | CD1     | 3.4706       |        |
|         | LEU 8     | CD2    | LEU 108     | CD2     | 3.2821       |        |
|         | ILE 44    | CG2    | VAL 170     | CG1     | 3.3951       |        |
|         | ILE 44    | CD1    | VAL 170     | CB      | 3.4933       |        |
|         | ILE 44    | CD1    | VAL 170     | CG1     | 3.3169       |        |
|         | ILE 44    | CD1    | VAL 170     | CG2     | 3.4479       |        |
|         | ALA 46    | C      | THR 109     | CG2     | 3.8304       |        |
|         | LYS 48    | CD     | LEU 173     | CD1     | 3.8369       |        |
|         | GLN 49    | CB     | ARG 172     | CD      | 3.4165       |        |
|         | GLN 49    | CD     | ARG 172     | CD      | 3.8101       |        |
|         | GLU 51    | CD     | ARG 172     | CZ      | 3.7977       |        |
|         | HIS 68    | CB     | LEU 108     | CD1     | 3.7102       |        |
|         | HIS 68    | CG     | LEU 108     | CD1     | 3.8432       |        |
|         | HIS 68    | CD2    | LEU 108     | CB      | 3.8161       |        |
|         | HIS 68    | CD2    | LEU 108     | CD1     | 3.8323       |        |
|         | VAL 70    | CG1    | ILE 144     | CG1     | 3.7345       |        |
|         | VAL 70    | CG1    | ILE 144     | CG2     | 3.3605       |        |
|         | VAL 70    | CG1    | ILE 144     | CD1     | 3.2544       |        |
|         | ARG 72    | CD     | GLN 149     | CB      | 3.6555       |        |
|         | ARG 72    | CD     | GLN 149     | CD      | 3.6357       |        |
|         | GLY 76    | C      | LYS 148     | CG      | 3.6998       |        |
|         | K63       | LEU 8  | CD2         | LEU 167 | CA           | 3.8686 |
|         |           | LEU 8  | CD2         | HIS 168 | CG           | 3.8698 |
|         |           | ILE 44 | CG2         | ALA 146 | CB           | 3.4716 |
|         |           | ILE 44 | CD1         | ALA 146 | CB           | 3.6041 |
|         |           | GLY 47 | CA          | LYS 148 | CB           | 3.6563 |
|         |           | HIS 68 | CD2         | ALA 146 | C            | 3.6138 |
|         |           | HIS 68 | CD2         | GLY 147 | CA           | 3.6379 |
| ARG 72  |           | CZ     | GLN 162     | CD      | 3.6860       |        |
| GLY 76  |           | CA     | LYS 163     | CE      | 3.2881       |        |
| GLY 76  |           | C      | LYS 163     | CD      | 3.8408       |        |
| GLY 76  |           | C      | LYS 163     | CE      | 2.9687       |        |

## K6

|        |     |         |     |        |
|--------|-----|---------|-----|--------|
| LEU 8  | CB  | VAL 170 | CB  | 3.6134 |
| LEU 8  | CB  | VAL 170 | CG1 | 3.5834 |
| LEU 8  | CB  | VAL 170 | CG2 | 3.4358 |
| LEU 8  | CG  | VAL 170 | CG2 | 3.7952 |
| LEU 8  | CD1 | ILE 144 | CG1 | 3.2689 |
| LEU 8  | CD1 | ILE 144 | CD1 | 3.7985 |
| LEU 8  | CD1 | VAL 170 | CG1 | 3.5014 |
| LEU 8  | CD1 | VAL 170 | CG2 | 3.5130 |
| LEU 8  | CD2 | ILE 144 | CG1 | 3.7194 |
| LEU 8  | CD2 | ILE 144 | CD1 | 3.4261 |
| VAL 70 | CG1 | LEU 108 | CD1 | 3.8282 |
| LEU 71 | CB  | LEU 108 | CD1 | 3.6275 |
| GLY 76 | CA  | LYS 106 | CE  | 3.6235 |
| GLY 76 | C   | LYS 106 | CE  | 3.4208 |
| GLY 76 | C   | HIS 168 | CE1 | 3.6086 |

## K33

|        |     |         |     |        |
|--------|-----|---------|-----|--------|
| LEU 8  | CB  | LYS 111 | CD  | 3.7876 |
| LEU 8  | CD1 | THR 107 | CB  | 3.8609 |
| LEU 8  | CD1 | THR 109 | CB  | 3.5231 |
| LEU 8  | CD1 | GLY 110 | C   | 3.5986 |
| LEU 8  | CD1 | LYS 111 | CB  | 3.5215 |
| LEU 8  | CD2 | THR 109 | CB  | 3.8702 |
| ILE 44 | CD1 | GLY 110 | CA  | 3.3949 |
| ILE 44 | CD1 | GLY 110 | C   | 3.2441 |
| HIS 68 | CE1 | THR 109 | CG2 | 3.6187 |
| VAL 70 | CG1 | LYS 111 | CA  | 3.5818 |
| VAL 70 | CG1 | LYS 111 | CB  | 3.8524 |
| VAL 70 | CG1 | LYS 111 | CG  | 3.7282 |
| VAL 70 | CG2 | GLY 110 | C   | 3.8106 |
| GLY 76 | CA  | THR 114 | CB  | 3.5400 |
| GLY 76 | CA  | LYS 133 | CE  | 3.2218 |
| GLY 76 | C   | LYS 133 | CE  | 3.2562 |

## K29

|        |     |         |    |        |
|--------|-----|---------|----|--------|
| LEU 8  | CB  | GLU 124 | CD | 3.6287 |
| LEU 8  | CD1 | PRO 138 | C  | 3.6895 |
| HIS 68 | CD2 | ASP 139 | CG | 3.5146 |
| ARG 72 | CD  | ASP 132 | CG | 3.8713 |
| GLY 76 | CA  | LYS 129 | CG | 3.3689 |
| GLY 76 | CA  | LYS 129 | CE | 3.2681 |
| GLY 76 | C   | LYS 129 | CE | 2.9820 |

## K27

|        |     |         |     |        |
|--------|-----|---------|-----|--------|
| LEU 8  | CB  | VAL 170 | CB  | 3.5925 |
| LEU 8  | CB  | VAL 170 | CG1 | 3.3477 |
| LEU 8  | CD1 | VAL 170 | CB  | 3.6579 |
| LEU 8  | CD1 | VAL 170 | CG2 | 3.5858 |
| LEU 8  | CD2 | VAL 170 | CB  | 3.8928 |
| ARG 74 | CZ  | GLU 151 | CD  | 3.7677 |
| GLY 76 | CA  | ASP 152 | CG  | 3.6636 |
| GLY 76 | C   | ARG 142 | CD  | 3.5304 |

## K11

|        |     |         |     |        |
|--------|-----|---------|-----|--------|
| LEU 8  | CB  | VAL 170 | CB  | 3.8168 |
| LEU 8  | CB  | VAL 170 | CG1 | 3.3952 |
| LEU 8  | CB  | VAL 170 | CG2 | 3.4215 |
| LEU 8  | CD1 | ILE 144 | CG1 | 3.7584 |
| LEU 8  | CD1 | ILE 144 | CG2 | 3.5840 |
| LEU 8  | CD1 | ILE 144 | CD1 | 3.5567 |
| LEU 8  | C   | VAL 170 | CG2 | 3.7993 |
| THR 9  | CB  | ARG 172 | CB  | 3.5523 |
| THR 9  | CG2 | ARG 142 | CB  | 3.6045 |
| THR 9  | CG2 | ARG 142 | CG  | 3.4507 |
| THR 9  | CG2 | VAL 170 | CG2 | 3.6381 |
| THR 9  | CG2 | LEU 171 | C   | 3.6172 |
| THR 9  | CG2 | ARG 172 | CA  | 3.8273 |
| THR 9  | CG2 | ARG 172 | CB  | 3.5893 |
| ILE 36 | CG1 | ARG 174 | C   | 3.6287 |
| PRO 37 | CD  | GLY 175 | CA  | 3.7910 |
| PRO 37 | CD  | GLY 175 | C   | 3.8833 |
| ILE 44 | CD1 | LEU 108 | CB  | 3.7526 |
| ILE 44 | CD1 | LEU 108 | CG  | 3.8855 |
| ILE 44 | CD1 | LEU 108 | CD1 | 3.7808 |
| ILE 44 | CD1 | LEU 108 | CD2 | 3.5742 |
| VAL 70 | CG1 | LEU 108 | CB  | 3.4238 |
| VAL 70 | CG2 | LEU 108 | CB  | 3.4030 |
| VAL 70 | CG2 | LEU 108 | CD1 | 3.5491 |
| LEU 71 | CD1 | LEU 173 | CB  | 3.6805 |
| LEU 71 | C   | THR 109 | CG2 | 3.8131 |
| ARG 72 | CA  | THR 109 | CG2 | 3.6567 |
| ARG 72 | CG  | THR 109 | CB  | 3.6985 |
| ARG 72 | CG  | THR 109 | CG2 | 3.6046 |
| ARG 72 | CD  | THR 109 | CB  | 3.4274 |
| ARG 72 | CD  | THR 109 | CG2 | 3.6889 |
| GLY 76 | CA  | LYS 111 | CB  | 3.7632 |
| GLY 76 | CA  | LYS 111 | CE  | 3.3298 |
| GLY 76 | C   | LYS 111 | CE  | 2.9809 |

## HT

|        |     |         |     |        |
|--------|-----|---------|-----|--------|
| LEU 8  | CD1 | LEU 115 | CD2 | 3.784  |
| LEU 8  | CD2 | LYS 133 | CB  | 3.8453 |
| LEU 8  | CD2 | LYS 133 | CG  | 3.8271 |
| LEU 8  | CD2 | LYS 133 | CD  | 3.7156 |
| ILE 44 | CD1 | THR 114 | CB  | 3.842  |
| ILE 44 | CD1 | LYS 133 | CE  | 3.6356 |
| GLY 47 | CA  | LYS 111 | CE  | 3.6155 |
| VAL 70 | CG2 | LYS 133 | CE  | 3.6768 |
| ARG 72 | CD  | GLN 102 | CD  | 3.5372 |
| ARG 72 | CZ  | PHE 104 | CE1 | 3.5885 |
| ARG 72 | CZ  | PHE 104 | CZ  | 3.8362 |
| GLY 75 | CA  | LYS 163 | CD  | 3.7694 |
| GLY 75 | C   | LYS 163 | CD  | 3.8364 |
| GLY 76 | CA  | MET 101 | CA  | 3.189  |

## K48\*

|        |    |         |    |        |
|--------|----|---------|----|--------|
| GLY 75 | CA | GLU 151 | CD | 3.4615 |
| GLY 75 | C  | GLU 151 | CD | 3.7598 |
| GLY 76 | CA | LYS 148 | CE | 3.2525 |
| GLY 76 | C  | LYS 148 | CE | 3.7417 |

### S3: Details of the PCA analysis

To account for the highly dispersed nature of the data, PCA analysis was performed by using the mean centered correlation matrix (X) of the original data (D) corresponding to Table 2 (except  $H_{\text{bonds}}$  per  $100\text{\AA}^2$ ). Eigenvalues ( $\lambda$ ) and eigenvectors (V) were obtained after diagonalization of the X matrix. Eigenvectors were ranked in descending order according to their respective eigenvalues. The percentage of variance explained (or accounted for) by each eigenvalue ( $\lambda_j$ ) is obtained by dividing the corresponding eigenvalue ( $\lambda_j$ ) by the sum of all the eigenvalues.

The first principal plane (PC1 & PC2) accounts for 78.9% of the total information provided. Adding the third component/axis (PC3) will result in 90.6% of the information being covered (Table S3).

**Table S3: Percent of the variance explained by each eigenvalue.** Only the first 7 PCs are shown.

|                                                      | PC1  | PC2  | PC3  | PC4  | PC5  | PC6  | PC7   |
|------------------------------------------------------|------|------|------|------|------|------|-------|
| Eigenvalue                                           | 5.3  | 4.2  | 1.4  | 0.8  | 0.2  | 0.1  | 0.0   |
| % variance explained                                 | 44.1 | 34.8 | 11.8 | 6.4  | 2.1  | 0.7  | 0.2   |
| total variance covered by this and all preceding PCs | 44.1 | 78.9 | 90.6 | 97.1 | 99.1 | 99.8 | 100.0 |

Eigenvectors provide the principal component coefficients also known as loadings. These coefficients represent coordinates of each descriptor in the principal axes system of the PC components. Each coefficient ( $c_{ij}$ ) is obtained as  $c_{ij} = \sqrt{\lambda_j} V_{ij}$ , where  $j$  is the eigenvalue index,  $i$  numerates the variables, and  $V_{ij}$  is the element of the eigenvector matrix  $V$ . The corresponding coefficients for the 12 variables considered here are shown in Table S4.

For facilitate the analysis of the relationship between the principal components and the variables of interest, it is convenient to plot these principal component coefficients on the correlation circle (Figure 4a,c, main text). The quality of the representation of each variable  $i$  by a given principal component  $j$  (Table S5) can be assessed by the squared cosine of the angle ( $\beta$ ) formed by the principal axis PC $j$  and the vector connecting the corresponding point with the origin. The corresponding expression is:  $\cos^2 \beta_{ij} = c_{ij}^2$ . The sum of  $\cos^2 \beta$  values over the two PC components gives an assessment of the quality of the representation of a variable on the corresponding plane.

**Table S4: Correlation between the first four principal components and the original variables**

| <b>variables</b>   | <b>PC1</b> | <b>PC2</b> | <b>PC3</b> | <b>PC4</b> |
|--------------------|------------|------------|------------|------------|
| E <sub>inter</sub> | 0.50       | -0.83      | 0.10       | 0.21       |
| E <sub>vdw</sub>   | 0.32       | -0.72      | -0.42      | -0.38      |
| E <sub>elec</sub>  | 0.50       | -0.80      | 0.17       | 0.28       |
| BSA                | -0.89      | 0.31       | -0.25      | 0.17       |
| E <sub>rest</sub>  | 0.52       | 0.85       | -0.07      | 0.03       |
| E <sub>unamb</sub> | 0.07       | 0.02       | 0.99       | 0.03       |
| E <sub>amb</sub>   | 0.51       | 0.85       | -0.10      | 0.03       |
| H <sub>bonds</sub> | -0.72      | 0.58       | 0.27       | -0.14      |
| H <sub>hydro</sub> | -0.87      | -0.45      | -0.04      | 0.18       |
| E <sub>bind</sub>  | 0.91       | -0.07      | 0.10       | -0.37      |
| H <sub>score</sub> | 0.74       | 0.30       | -0.24      | 0.53       |
| ASA <sub>hp</sub>  | 0.84       | 0.38       | 0.05       | -0.01      |

**Table S5: The corresponding squared cosines given for the first four principal components**

| <b>variables</b>   | <b>PC1</b> | <b>PC2</b> | <b>PC3</b> | <b>PC4</b> |
|--------------------|------------|------------|------------|------------|
| E <sub>inter</sub> | 0.25       | 0.69       | 0.01       | 0.05       |
| E <sub>vdw</sub>   | 0.10       | 0.52       | 0.17       | 0.14       |
| E <sub>elec</sub>  | 0.25       | 0.65       | 0.03       | 0.08       |
| BSA                | 0.80       | 0.09       | 0.06       | 0.03       |
| E <sub>rest</sub>  | 0.27       | 0.72       | 0.00       | 0.00       |
| E <sub>unamb</sub> | 0.01       | 0.00       | 0.99       | 0.00       |
| E <sub>amb</sub>   | 0.26       | 0.72       | 0.01       | 0.00       |
| H <sub>bonds</sub> | 0.52       | 0.34       | 0.07       | 0.02       |
| H <sub>hydro</sub> | 0.75       | 0.20       | 0.00       | 0.03       |
| E <sub>bind</sub>  | 0.83       | 0.01       | 0.01       | 0.14       |
| H <sub>score</sub> | 0.55       | 0.09       | 0.06       | 0.28       |
| ASA <sub>hp</sub>  | 0.70       | 0.15       | 0.00       | 0.00       |

The representation of the original data in the principal axes system is known as scores (Table S6). Their respective components ( $Y_{ij}$ ) are obtained according to  $Y=D.V$ ,  $D$  being the original data matrix (Table 2) and  $V$  the matrix containing column eigenvectors. The quality of the representation of the data on a principal axis is given by its squared cosine (Table S7). It is defined by  $\cos \alpha_{ij} = OH_j / Oi$ . Here  $Oi$  is the length of the vector connecting the origin and the  $i^{th}$  data point, and  $OH_j$  is the projection of this vector onto the  $j^{th}$  axis. The squared cosine of the angle  $\alpha$  can then be expressed as

$$\cos^2 \alpha_{ij} = Y_{ij}^2 / \sum_{j=1}^p Y_{ij}^2$$

where  $p$  is the total number of principal components.

**Table S6: Representation of the coordinates of the data in the new principal axes system.**

Only the first four PCs are shown

| <b>linkage</b> | <b>PC1</b> | <b>PC2</b> | <b>PC3</b> | <b>PC4</b> |
|----------------|------------|------------|------------|------------|
| K48            | -4.60      | 0.51       | -0.31      | -0.90      |
| K63            | 2.42       | -0.58      | 0.36       | 0.18       |
| K6             | -0.96      | -1.74      | 0.26       | 0.44       |
| K33            | 3.25       | -1.98      | -0.26      | -0.80      |
| K29            | 1.08       | 2.37       | -1.33      | -1.16      |
| K27            | -0.81      | -0.61      | 2.51       | -0.25      |
| K11            | -1.16      | -1.96      | -1.65      | 1.27       |
| HT             | 0.79       | 4.00       | 0.43       | 1.21       |



**Table S7: Squared cosine of the scores.**

Only the first four PCs are shown

| <b>linkage</b> | <b>PC1</b> | <b>PC2</b> | <b>PC3</b> | <b>PC4</b> |
|----------------|------------|------------|------------|------------|
| K48            | 0.94       | 0.01       | 0.00       | 0.04       |
| K63            | 0.86       | 0.05       | 0.02       | 0.01       |
| K6             | 0.17       | 0.55       | 0.01       | 0.04       |
| K33            | 0.69       | 0.26       | 0.00       | 0.04       |
| K29            | 0.12       | 0.56       | 0.18       | 0.14       |
| K27            | 0.08       | 0.05       | 0.81       | 0.01       |
| K11            | 0.14       | 0.39       | 0.28       | 0.16       |
| HT             | 0.03       | 0.87       | 0.01       | 0.08       |

**Table S8: Summary of HADDOCK parameters for the best structure of the best cluster for each of the eight linkages.**

| Chain linkage | $E_{\text{inter}}$ (kcal/mol) | $E_{\text{vdw}}^{\text{a}}$ (kcal/mol) | $E_{\text{elec}}^{\text{a}}$ (kcal/mol) | BSA ( $\text{\AA}^2$ ) | $E_{\text{rest}}$ (kcal/mol) | $E_{\text{unamb}}^{\text{b}}$ (kcal/mol) | $E_{\text{amb}}^{\text{c}}$ (kcal/mol) | $H_{\text{bonds}}$ | $H_{\text{hydro}}^{\text{d}}$ | $E_{\text{bind}}^{\text{e}}$ | $H_{\text{score}}$ (a.u.) | $\text{ASA}_{\text{hp}}^{\text{f}}$ ( $\text{\AA}^2$ ) | $H_{\text{bond}}^{\text{g}}$ per 100 $\text{\AA}^2$ |
|---------------|-------------------------------|----------------------------------------|-----------------------------------------|------------------------|------------------------------|------------------------------------------|----------------------------------------|--------------------|-------------------------------|------------------------------|---------------------------|--------------------------------------------------------|-----------------------------------------------------|
| K48           | -346.4                        | -7.2                                   | -339.2                                  | 1362                   | 4.8                          | 4.0                                      | 0.8                                    | 9                  | 14                            | -11.3                        | -135.3                    | 63.1                                                   | 0.66                                                |
| K63           | -143.8                        | 1.0                                    | -144.8                                  | 896                    | 26.3                         | 2.2                                      | 24.1                                   | 4                  | 0                             | -7.0                         | -73.4                     | 263.8                                                  | 0.45                                                |
| K6            | -191.5                        | -5.7                                   | -185.8                                  | 1072                   | 7.0                          | 3.1                                      | 3.9                                    | 6                  | 11                            | -9.1                         | -81.2                     | 53.7                                                   | 0.56                                                |
| K33           | -92.2                         | 4.7                                    | -96.9                                   | 820                    | 19.5                         | 2.9                                      | 16.6                                   | 2                  | 0                             | -5.4                         | -72.8                     | 253.2                                                  | 0.24                                                |
| K29           | -279.6                        | -3.0                                   | -276.5                                  | 1020                   | 53.6                         | 2.3                                      | 51.4                                   | 5                  | 0                             | -6.9                         | -90.9                     | 239.9                                                  | 0.49                                                |
| K27           | -261.0                        | -8.5                                   | -252.5                                  | 1139                   | 12.2                         | 4.0                                      | 8.2                                    | 7                  | 5                             | -9.2                         | -101.3                    | 181.2                                                  | 0.61                                                |
| K11           | -182.3                        | -12.5                                  | -169.8                                  | 1405                   | 3.2                          | 2.3                                      | 0.9                                    | 5                  | 14                            | -11.5                        | -84.1                     | 140.3                                                  | 0.36                                                |
| HT            | -243.9                        | -24.4                                  | -219.5                                  | 1200                   | 61.7                         | 2.2                                      | 59.4                                   | 5                  | 0                             | -8.3                         | -36.3                     | 270.9                                                  | 0.42                                                |
| K48*          | -144.0                        | 7.4                                    | -151.4                                  | 315                    | 1.8                          | 1.8                                      | N/A                                    | 1                  | 0                             | -4.8                         | -54.7                     | 273.8                                                  | 0.32                                                |

**Table S9: Percent of the variance explained by each eigenvalue for the best structure of the best cluster. Only the first 7 PCs are shown.**

|                                                      | PC1  | PC2  | PC3  | PC4  | PC5  | PC6   | PC7   |
|------------------------------------------------------|------|------|------|------|------|-------|-------|
| Eigenvalue                                           | 6.7  | 3.0  | 1.6  | 0.4  | 0.3  | 0.1   | 0.0   |
| % variance explained                                 | 55.7 | 24.6 | 13.5 | 3.5  | 2.1  | 0.6   | 0.0   |
| total variance covered by this and all preceding PCs | 55.7 | 80.3 | 93.8 | 97.3 | 99.4 | 100.0 | 100.0 |

**Table S10: Correlation between the first four principal components and the original variables**

| <b>variables</b>   | <b>PC1</b> | <b>PC2</b> | <b>PC3</b> | <b>PC4</b> |
|--------------------|------------|------------|------------|------------|
| E <sub>inter</sub> | 0.67       | -0.65      | -0.36      | -0.06      |
| E <sub>vdw</sub>   | 0.22       | -0.76      | 0.53       | 0.29       |
| E <sub>elec</sub>  | 0.67       | -0.59      | -0.43      | -0.10      |
| BSA                | -0.78      | 0.40       | -0.44      | 0.08       |
| E <sub>rest</sub>  | 0.64       | 0.74       | 0.15       | 0.06       |
| E <sub>unamb</sub> | -0.71      | -0.23      | 0.45       | -0.48      |
| E <sub>amb</sub>   | 0.66       | 0.73       | 0.13       | 0.07       |
| H <sub>bonds</sub> | -0.90      | 0.32       | 0.20       | -0.08      |
| H <sub>hydro</sub> | -0.89      | -0.21      | -0.36      | 0.14       |
| E <sub>bind</sub>  | 0.89       | -0.15      | 0.40       | -0.06      |
| H <sub>score</sub> | 0.78       | 0.25       | -0.50      | -0.22      |
| ASA <sub>hp</sub>  | 0.88       | 0.25       | 0.11       | -0.05      |

**Table S11: The corresponding squared cosines given for the first four principal components**

| <b>variables</b>   | <b>PC1</b> | <b>PC2</b> | <b>PC3</b> | <b>PC4</b> |
|--------------------|------------|------------|------------|------------|
| E <sub>inter</sub> | 0.45       | 0.42       | 0.13       | 0.00       |
| E <sub>vdw</sub>   | 0.05       | 0.58       | 0.29       | 0.08       |
| E <sub>elec</sub>  | 0.45       | 0.35       | 0.19       | 0.01       |
| BSA                | 0.60       | 0.16       | 0.19       | 0.01       |
| E <sub>rest</sub>  | 0.42       | 0.55       | 0.02       | 0.00       |
| E <sub>unamb</sub> | 0.50       | 0.05       | 0.20       | 0.23       |
| E <sub>amb</sub>   | 0.43       | 0.54       | 0.02       | 0.01       |
| H <sub>bonds</sub> | 0.81       | 0.10       | 0.04       | 0.01       |
| H <sub>hydro</sub> | 0.79       | 0.05       | 0.13       | 0.02       |
| E <sub>bind</sub>  | 0.79       | 0.02       | 0.16       | 0.00       |
| H <sub>score</sub> | 0.62       | 0.06       | 0.25       | 0.05       |
| ASA <sub>hp</sub>  | 0.77       | 0.06       | 0.01       | 0.00       |

**Table S12: Representation of the coordinates of the data in the new principal axes system.** Only the first four PCs are shown

| <b>linkage</b> | <b>PC1</b> | <b>PC2</b> | <b>PC3</b> | <b>PC4</b> |
|----------------|------------|------------|------------|------------|
| K48            | -4.87      | 0.37       | 1.08       | 0.16       |
| K63            | 2.52       | -1.00      | 0.22       | 0.38       |
| K6             | -1.22      | -1.32      | -0.62      | -0.14      |
| K33            | 3.18       | -2.48      | 0.48       | -0.38      |
| K29            | 1.52       | 1.70       | 1.58       | 1.05       |
| K27            | -1.63      | -0.06      | 0.95       | -1.04      |
| K11            | -1.58      | -0.59      | -2.53      | 0.64       |
| HT             | 2.07       | 3.37       | -1.16      | -0.68      |

**Table S13: Squared cosine of the scores.**

Only the first four PCs are shown

| <b>linkage</b> | <b>PC1</b> | <b>PC2</b> | <b>PC3</b> | <b>PC4</b> |
|----------------|------------|------------|------------|------------|
| K48            | 0.95       | 0.01       | 0.05       | 0.00       |
| K63            | 0.80       | 0.13       | 0.01       | 0.02       |
| K6             | 0.29       | 0.35       | 0.08       | 0.00       |
| K33            | 0.60       | 0.36       | 0.01       | 0.01       |
| K29            | 0.26       | 0.33       | 0.28       | 0.12       |
| K27            | 0.54       | 0.00       | 0.19       | 0.22       |
| K11            | 0.25       | 0.03       | 0.64       | 0.04       |
| HT             | 0.25       | 0.65       | 0.08       | 0.03       |

**Figure S1: Principal component analysis for the best structure of the best cluster for each generated chains**

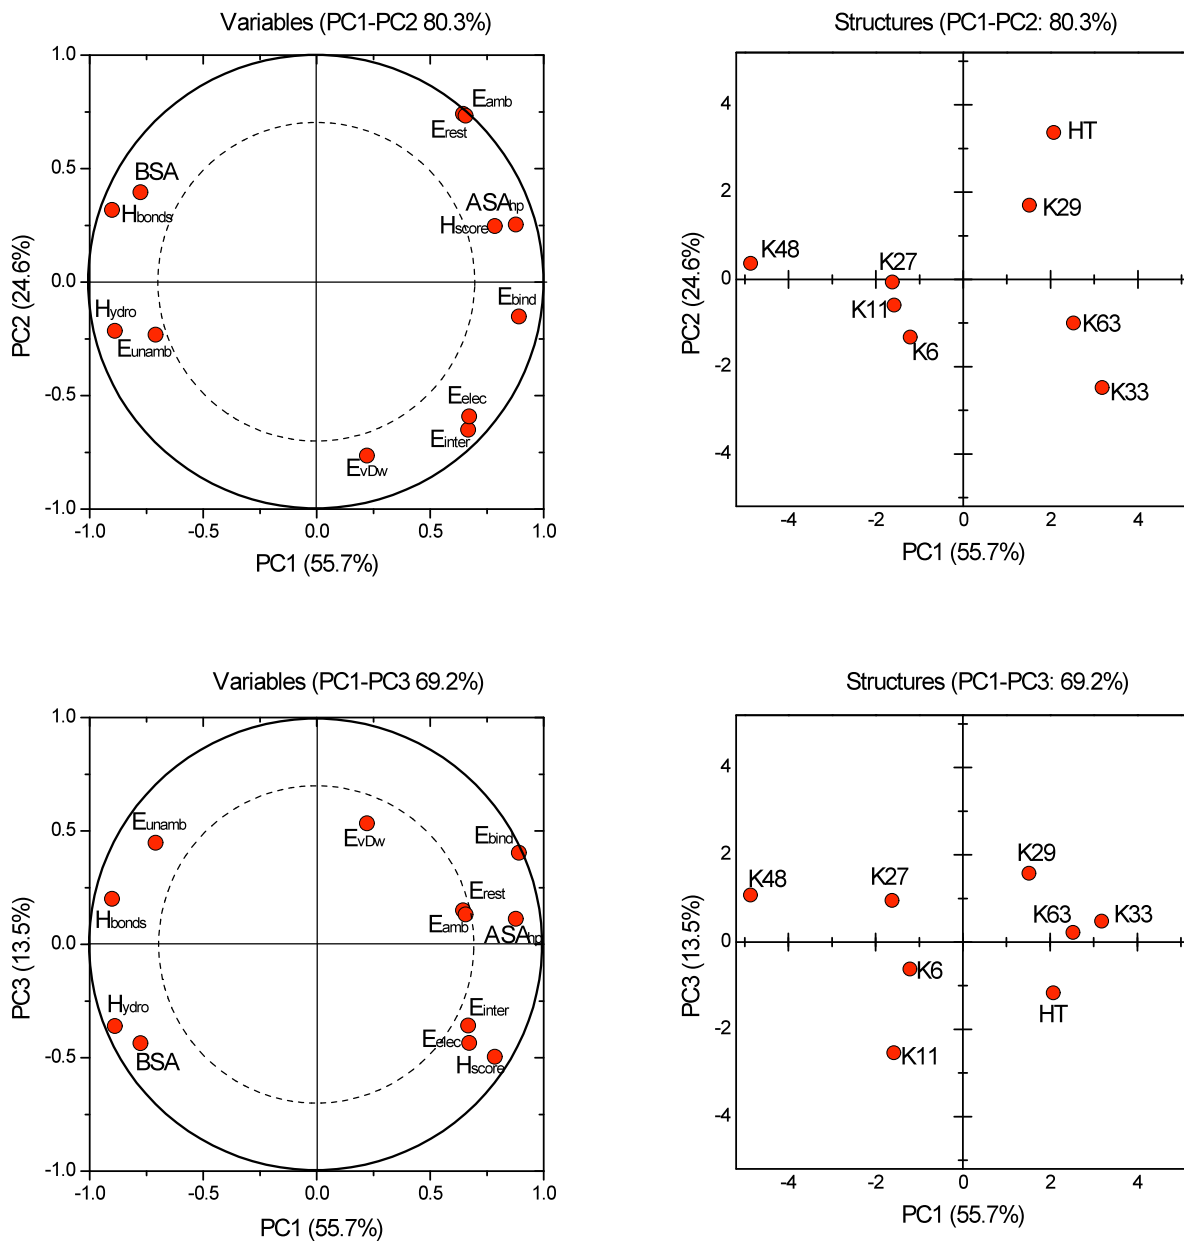

**Figure S2: Principal component analysis for the 10 best structures for each generated chains**

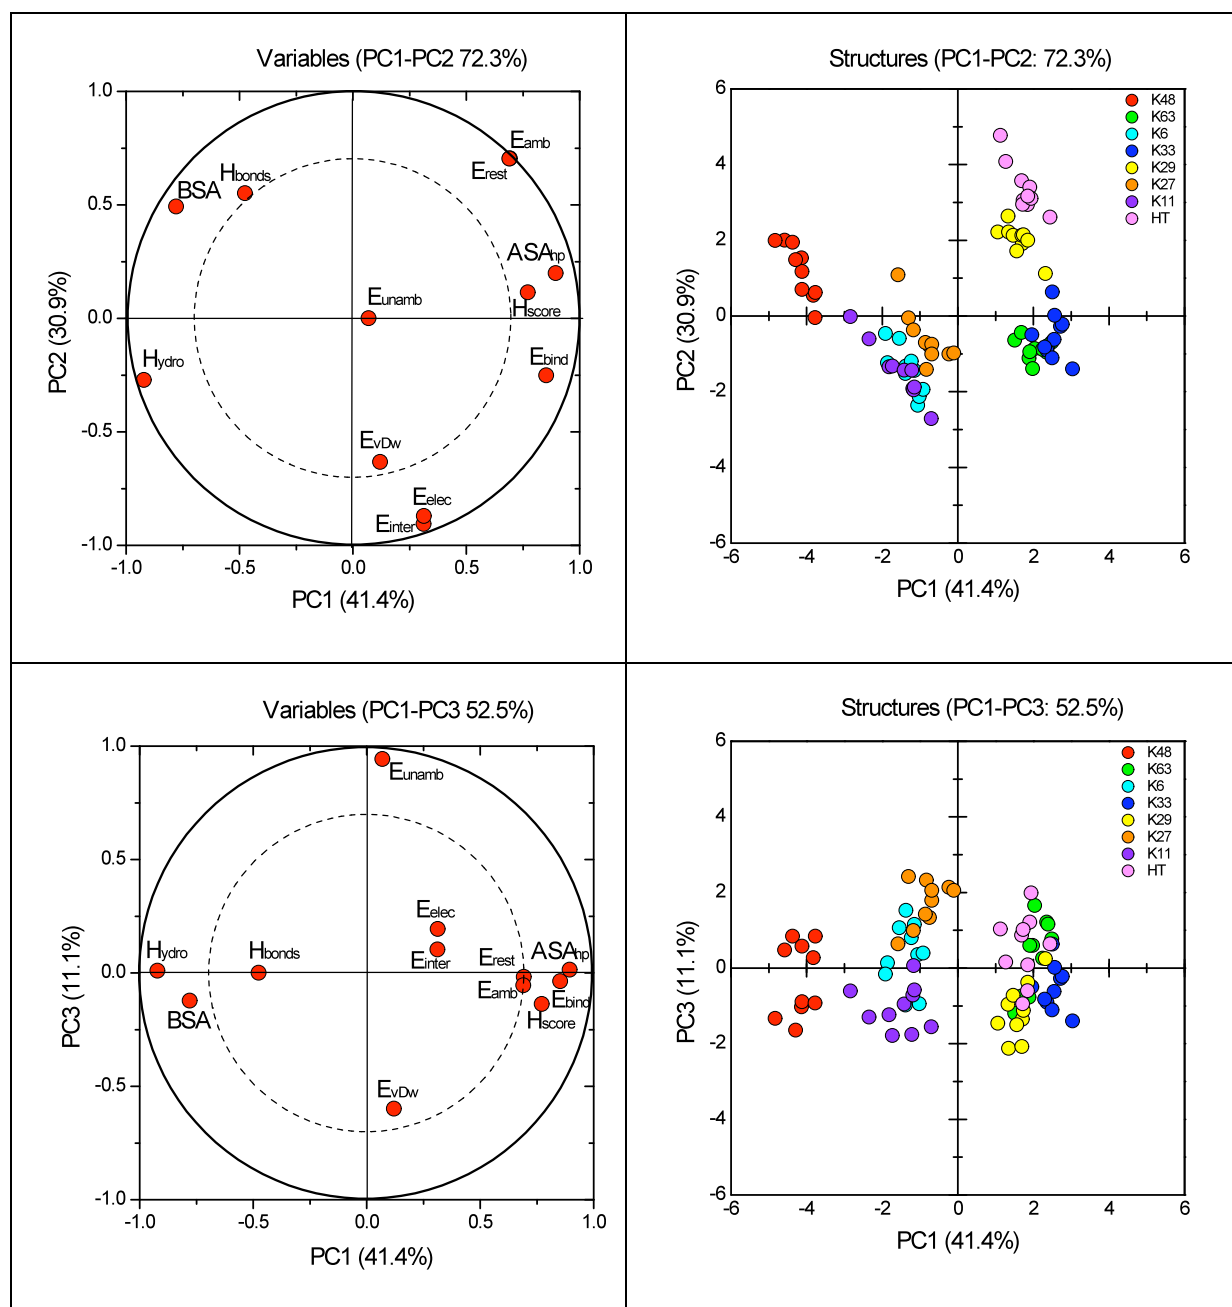

**References:**

1. Saha, R. P., Bahadur, R. P., Pal, A., Mandal, S. & Chakrabarti, P. (2006). ProFace: a server for the analysis of the physicochemical features of protein-protein interfaces. *BMC Struct Biol* **6**, 11.
